# Supplementary material for: Levoglucosenone as a starting material for cascade continuous-flow synthesis of (R)-γ-carboxy-γ-butyrolactone
Source: Royal Society of Chemistry journal article supplement (doi:10.1039/d4ra06403h), 2024-01-01
Supplement: d4ra06403h1.pdf [file d4ra06403h1.pdf]

Supporting Information for:

# Levoglucosenone as Starting Material for Cascade Continuous-Flow Synthesis of (*R*)- $\gamma$ -Carboxy- $\gamma$ - butyrolactone

Caio M. Pacheco,<sup>a</sup> Wesley Lima,<sup>a</sup> Fernanda A. Lima,<sup>a</sup> Mauro R. B. P. Gomez,<sup>a</sup> Isabela  
G. da Silva,<sup>a</sup> Leandro S. M. Miranda,<sup>a</sup> Pierre M. Esteves,<sup>b</sup> Ivaldo Itabaiana Jr,<sup>c</sup> Robert  
Wojcieszak,<sup>d,e</sup> Raquel A. C. Leão,<sup>a</sup> Rodrigo O. M. A. de Souza<sup>a\*</sup>

<sup>a</sup> Biocatalysis and Organic Synthesis Group, Chemistry Institute, Federal University of Rio de Janeiro, 21941910, Rio de Janeiro, Brazil;

<sup>b</sup> Instituto de Química, Universidade Federal do Rio de Janeiro, Av. Athos da Silveira Ramos, 149, CT, A-622, Cid. Univ., Rio de Janeiro, RJ 21941-909, Brazil

<sup>c</sup> Department of Biochemical Engineering, School of Chemistry, Federal University of Rio de Janeiro, 21941909, Rio de Janeiro, Brazil;

<sup>d</sup> Univ. Lille, CNRS, Centrale Lille, Univ. Artois, UMR 8181 - UCCS - Unité de Catalyse et Chimie du Solide, Lille, France;

<sup>e</sup> Université de Lorraine, CNRS, L2CM UMR 7053, F-54000 Nancy, France.

[souzarod21@gmail.com](mailto:souzarod21@gmail.com)

**Keywords:** *Continuous Flow Chemistry, Baeyer-Villiger Reaction, Levoglucosenone, Cyrene.*

## COMPOUND DATA CONTENT:

### Summary

|                                                                                                                                                    |    |
|----------------------------------------------------------------------------------------------------------------------------------------------------|----|
| 1. <i>Batch Reactions</i> .....                                                                                                                    | 2  |
| 1.1. Synthesis of lactone 2H-HBO (3) from Cyrene <sup>TM</sup> (2).....                                                                            | 2  |
| 1.2. Synthesis of oxidation of 2H-HBO (3) towards carboxylic acid 4 .....                                                                          | 3  |
| 2. <i>Chomatographic Analysis</i> .....                                                                                                            | 4  |
| 2.1. Gas Chromatography-Mass Spectrometry (GC-MS): Continuous-flow hydrogenation of LGO (1) for the production of Cyrene <sup>TM</sup> (2).....    | 4  |
| 2.2. Gas Chromatography-FID Spectrometry (GC-FID): Continuous-flow Baeyer-Villiger oxidation of Cyrene <sup>TM</sup> (2) towards 2H-HBO (3). ..... | 7  |
| 2.3. Gas Chromatography-Mass Spectrometry (GC-MS): Carboxylic acid 4 .....                                                                         | 10 |
| 2.4. Gas Chromatography-FID Spectrometry (GC-FID): Continuous-flow oxidation of 2H-HBO (3) towards carboxylic acid 4. ....                         | 10 |
| 3. <i>Spectral data</i> .....                                                                                                                      | 15 |

## EXPERIMENTAL

### 1. Batch Reactions

#### 1.1. Synthesis of lactone 2H-HBO (3) from Cyrene™ (2)

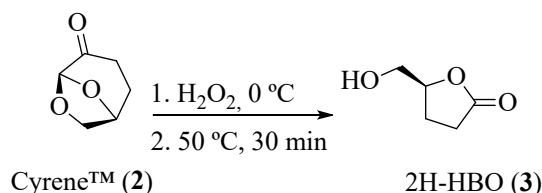

The synthesis of (S)- $\gamma$ -Hydroxymethyl- $\gamma$ -butyrolactone (2H-HBO, **3**) from Cyrene™ (**2**) was performed by a previously established method.<sup>i</sup>

The synthesis of 2H-HBO were performed in a 50 mL round bottom flask, a solution containing by slow dripping Hydrogen Peroxide 30 % (0.81 mL, 7.11 mmol, 1.08 Eq.) into a 6.6 M solution of Cyrene™ at 0 °C (0.844 g, 6.59 mmol, 1 Eq.) in 1 mL H<sub>2</sub>O. Then the solution was heated to 50 °C for 30 min and reaction progression was tracked through thin layer chromatography (ethyl acetate/cyclohexane 8:2). At the end, the reaction was heated to 90 °C to kill any hydrogen peroxide excess. The reaction was dried through rotatory evaporation, using cyclohexane as azeotrope then lyophilized. Obtaining the product in the form of a colorless oil of 0.75 g mass with an isolated yield of 98 % (Conv.: >99 %, Selec.: 97 %). <sup>1</sup>H NMR (400 MHz, CDCl<sub>3</sub>)  $\delta$  (ppm) 4.59 (tdd, J = 7.4, 4.6, 2.8 Hz, H 4 ), 3.86 (dd, J = 12.5, 2.8 Hz, H 5 b ), 3.64 – 3.55 (m, H 5 a ), 2.89 (s, H 6 ), 2.64 – 2.45 (m, H 2 ), 2.27 – 2.04 (m, H 3). <sup>13</sup>C NMR (126 MHz, CDCl<sub>3</sub>)  $\delta$  (ppm) 177.84 (s, C1), 80.87 (s, C4), 64.10 (s, C5), 28.70 (s, C2), 23.15 (s, C3).

i. Bonneau, G., Peru, A. A. M., Flourat, A. L. and Allais, F. *Green Chemistry* **2018**, *20*, 2455–2458.

## 1.2. Synthesis of oxidation of 2H-HBO (3) towards carboxylic acid 4

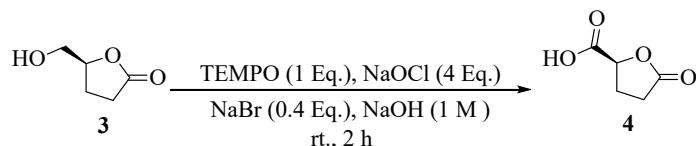

The synthesis of carboxylic acid **4** from 2H-HBO (**3**) was performed by a previously established method.<sup>ii</sup>

The synthesis of **4** was carried out in a 50 mL round bottom flask, containing 4 mL of distilled water and 232 mg of 2H-HBO (2 mmol, 1 Eq.), to this solution were added 312 mg of 2,2,6,6-tetramethylpiperidine 1-oxyl (TEMPO, 2 mmol, 1 Eq.), 82 mg of sodium bromide (0.8 mmol, 0.4 Eq.), and 550 mL of 10 % sodium hypochlorite solution (8 mmol, 4 Eq.). The pH of the solution was adjusted to 10 with 1 M sodium hydroxide and then stirred for two hours, monitored by thin layer chromatography (ethyl acetate/cyclohexane 8:2). After the total consumption of 2H-HBO (**3**), the reaction was quenched with 1 mL of ethanol. The pH was then reduced to 1 by a 6 M hydrochloric acid solution. For purification, a liquid-liquid extraction was carried out with dichloromethane, followed by rotary evaporation of the aqueous phase. The solid obtained was then resuspended with hot ethanol and subsequently filtered through a sintered funnel to remove inorganic salts. Obtaining the product in the form of 0.403g g of mass with an isolated yield of 82 % (Conv.: 82 %, Select.: 95 %). IR  $\nu_{\max}$  (KBr)  $\text{cm}^{-1}$ : 3550-3200, 1775, 1723, 1175.  $^1\text{H}$  NMR (400 MHz,  $\text{D}_2\text{O}$ )  $\delta$  (ppm)  $\delta$  2.4-2.6 (4H, m,  $-\text{CH}_2-\text{CH}_2$ ), 4.85-5.15 (H, m, ring-H), 5.1 (H, s,  $-\text{COOH}$ ).

ii. Kraus, T., Buděšínský, M., Z., Jiří. *J. Org. Chem.* **2001**, *66*, 4595–4600.

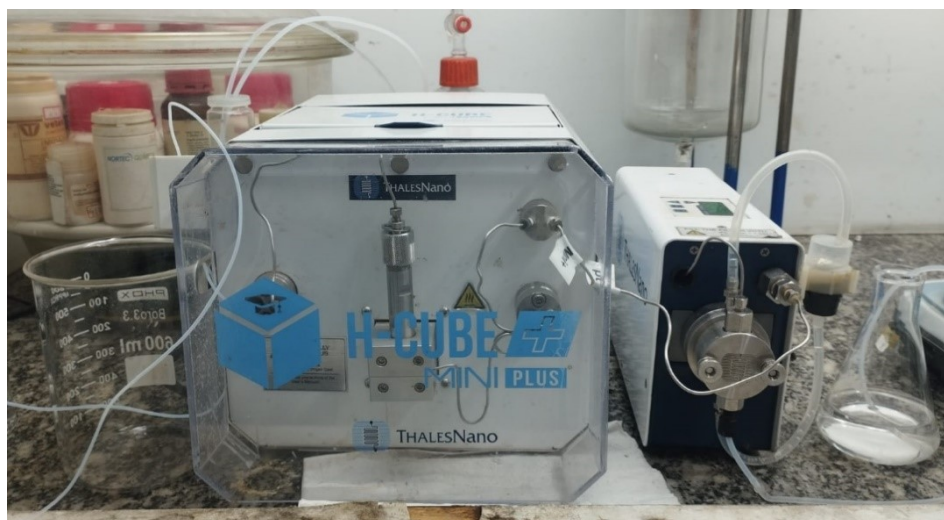

**Figure S1.** H-Cube® Mini Plus continuous flow hydrogenation reactor (ThalesNano).

## 2. Chromatographic Analysis

### 2.1. Gas Chromatography-Mass Spectrometry (GC-MS): Continuous-flow hydrogenation of LGO (1) for the production of Cyrene™(2).

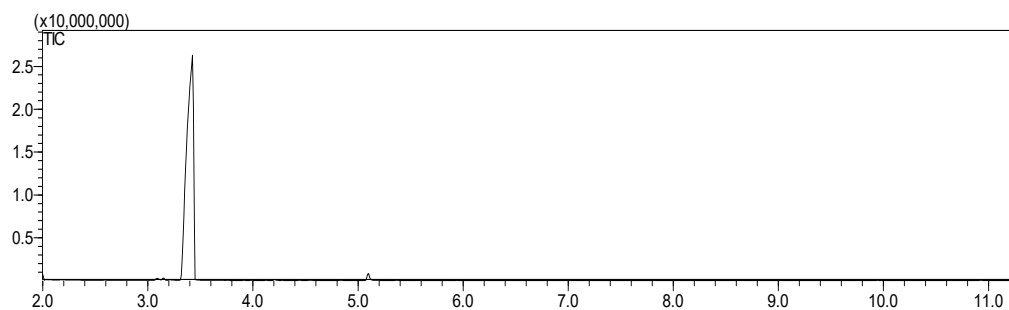

**Figure S2.** GC-MS chromatograms of standard Levoglucosenone, LGO (1) (3.4 min).

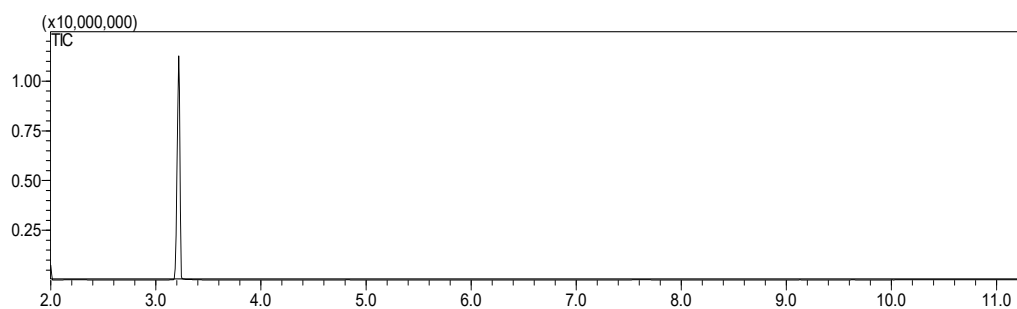

**Figure S3.** GC-MS chromatograms of standard Cyrene™ (2) (3.2 min).

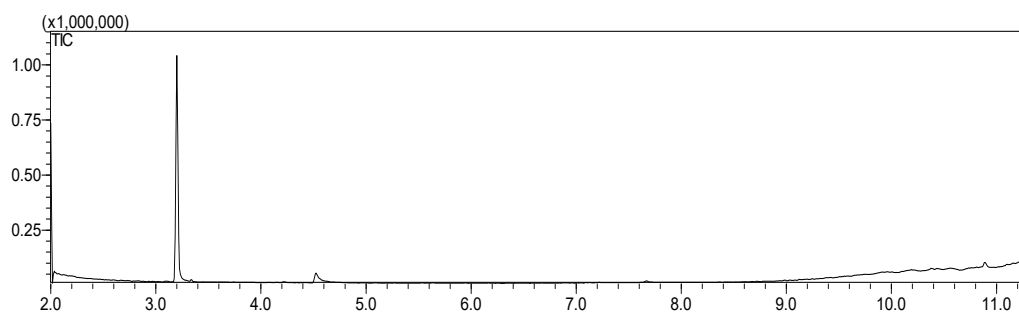

**Figure S4.** GC-MS chromatograms of continuous-flow hydrogenation of LGO (1) using Pd/C 10% (Table 1, entry 1).

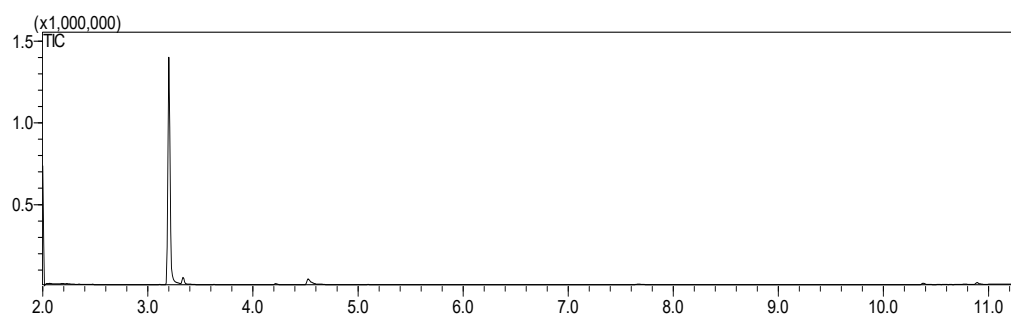

**Figure S5.** GC-MS chromatograms of continuous-flow hydrogenation of LGO (1) using Pd/C 10% (Table 1, entry 2).

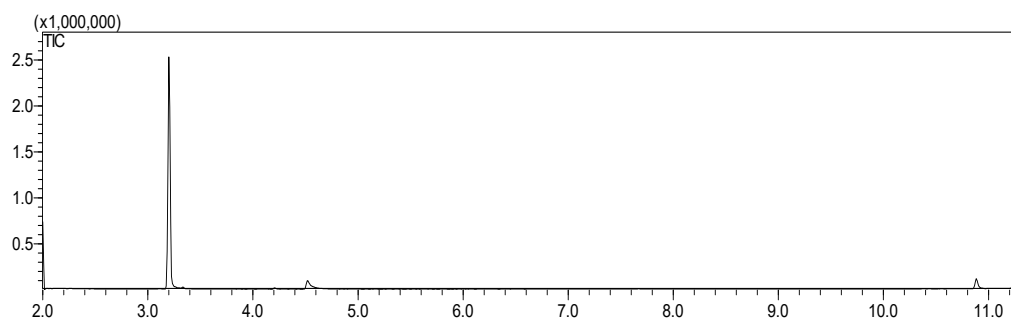

**Figure S6.** GC-MS chromatograms of continuous-flow hydrogenation of LGO (1) using Pd/C 10% (Table 1, entry 3).

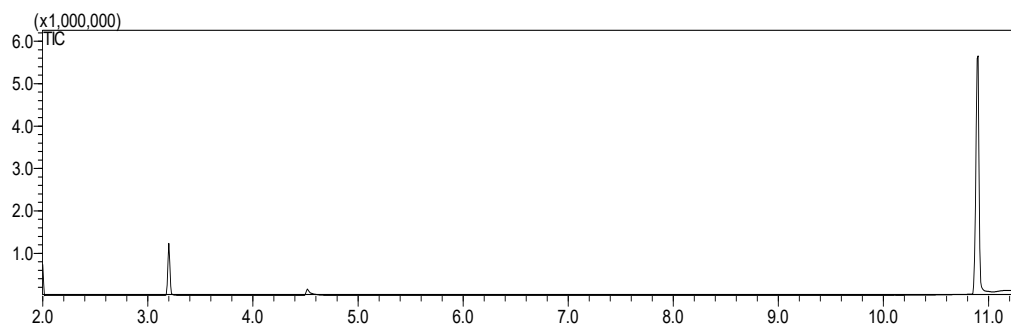

**Figure S7.** GC–MS chromatograms of continuous-flow hydrogenation of LGO (1) using Pd/C 10% (Table 1, entry 4).

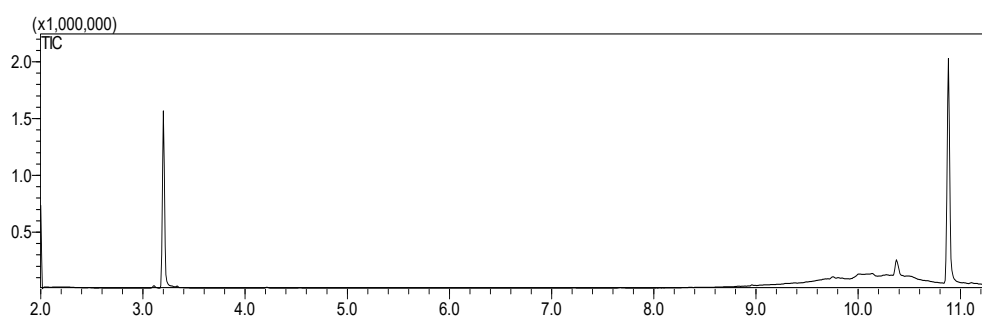

**Figure S8.** GC–MS chromatograms of continuous-flow hydrogenation of LGO (1) using Pd/C 10% (Table 1, entry 5).

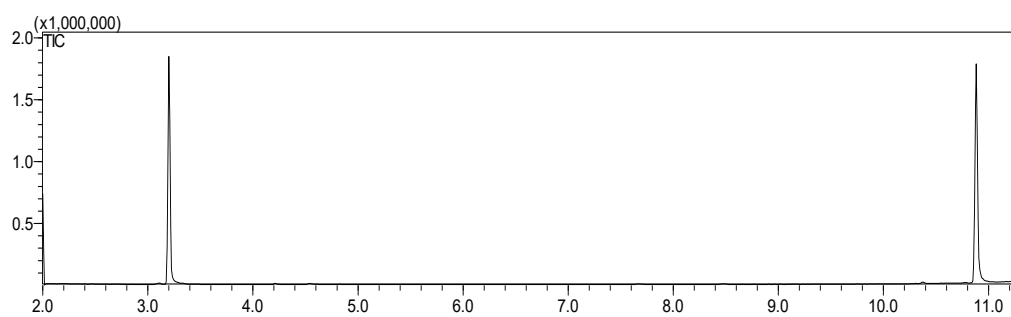

**Figure S9.** GC–MS chromatograms of continuous-flow hydrogenation of LGO (1) using Pd/C 10% (Table 1, entry 6).

## 2.2. Gas Chromatography-FID Spectrometry (GC-FID): Continuous-flow Baeyer-Villiger oxidation of Cyrene™ (2) towards 2H-HBO (3).

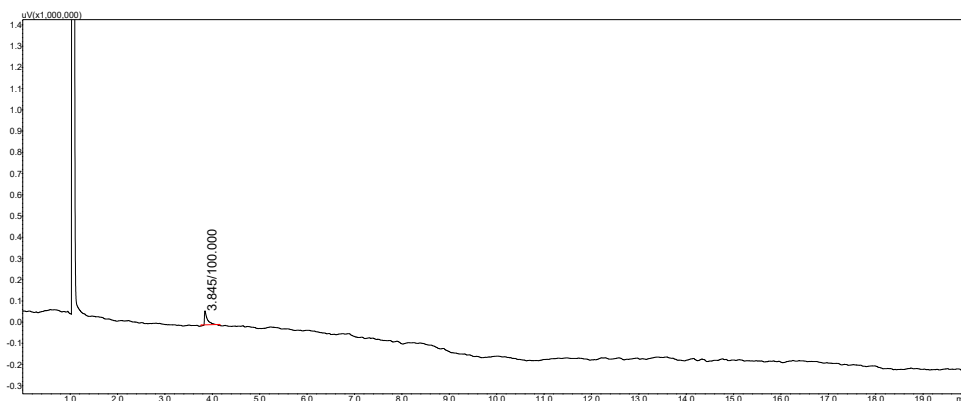

**Figure S10.** GC-FID standard Cyrene™ (2).

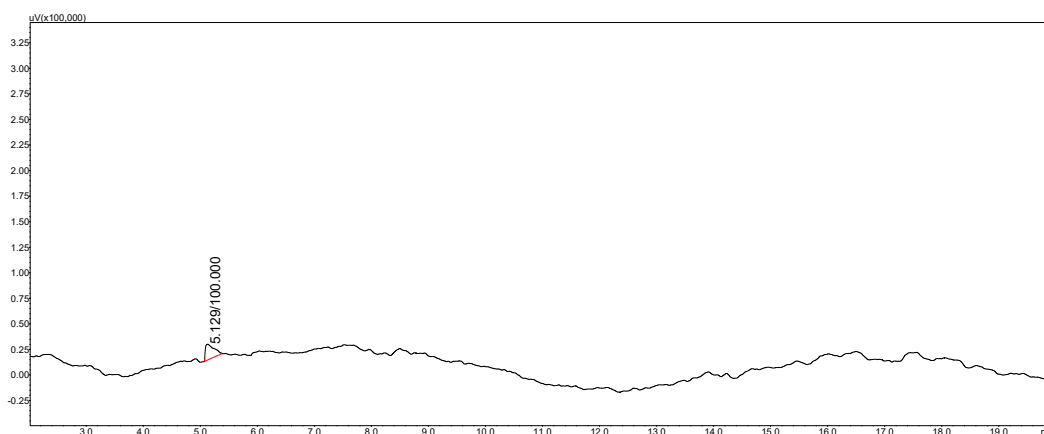

**Figure S11.** GC-FID chromatograms of continuous-flow Baeyer-Villiger oxidation of Cyrene™ (2) towards 2H-HBO (3) (Table 2, entry 1).

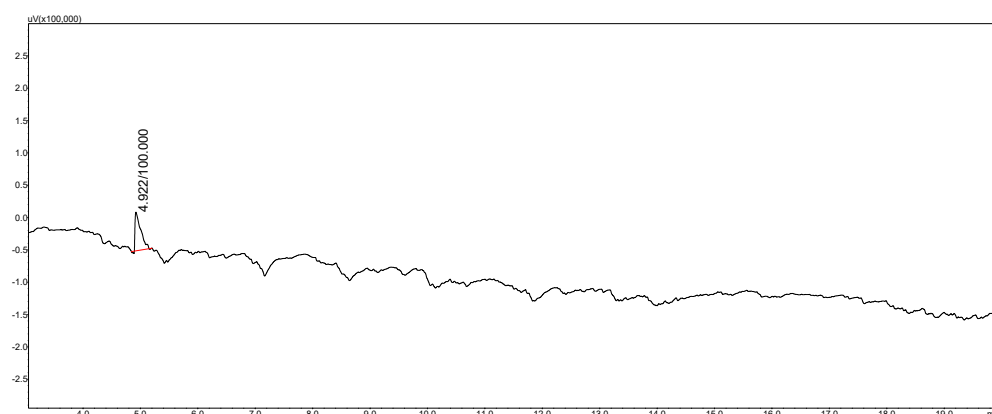

**Figure S12.** GC-FID chromatograms of continuous-flow Baeyer-Villiger oxidation of Cyrene™ (2) towards 2H-HBO (3) (Table 2, entry 2).

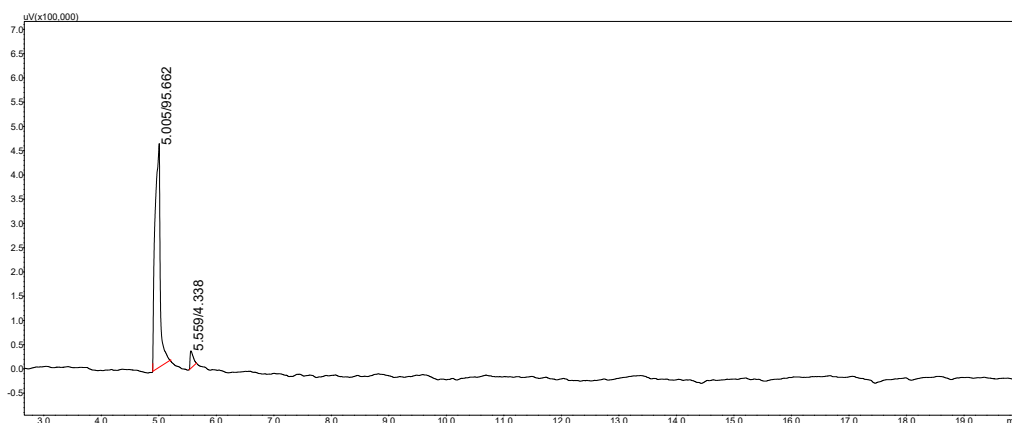

**Figure S13.** GC-FID chromatograms of continuous-flow Baeyer-Villiger oxidation of Cyrene™ (2) towards 2H-HBO (3) (Table 2, entry 3).

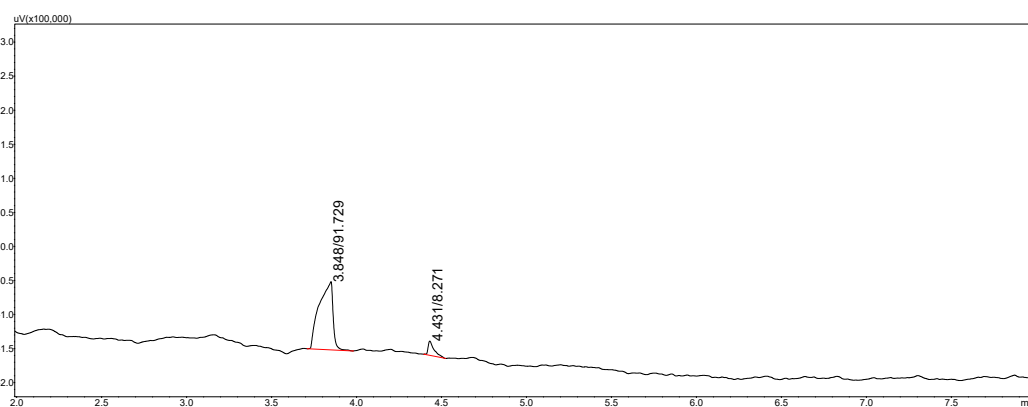

**Figure S14.** GC-FID chromatograms of continuous-flow Baeyer-Villiger oxidation of Cyrene™ (2) towards 2H-HBO (3) (Table 2, entry 4).

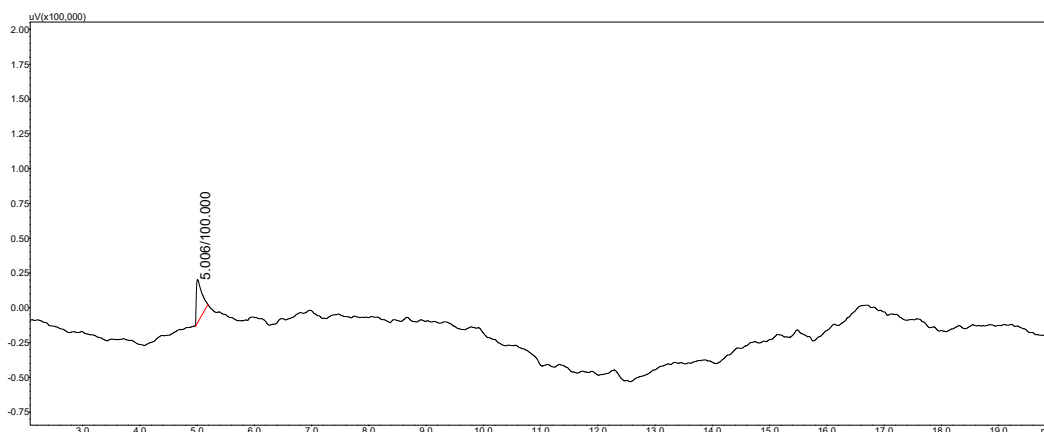

**Figure S15.** GC-FID chromatograms of continuous-flow Baeyer-Villiger oxidation of Cyrene™ (2) towards 2H-HBO (3) (Table 2, entry 5).



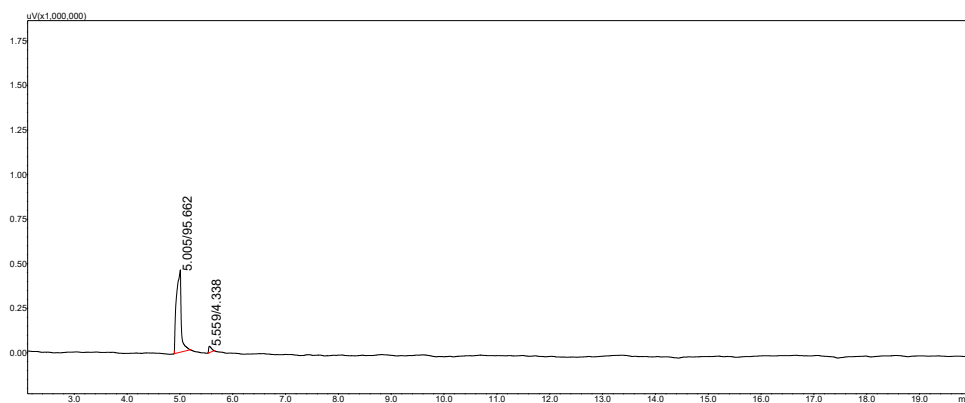

**Figure S16.** GC-FID chromatograms of continuous-flow Baeyer-Villiger oxidation of Cyrene™ (2) towards 2H-HBO (3) (Table 2, entry 6).

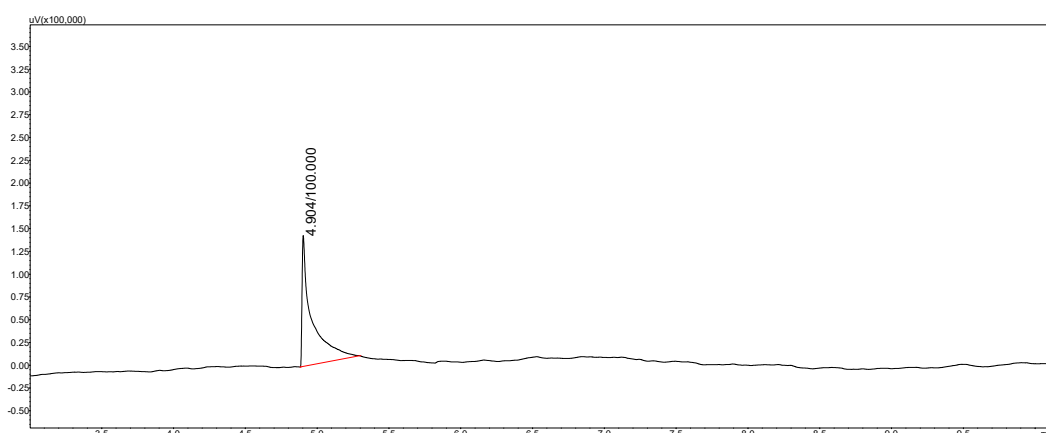

**Figure S17.** GC-FID chromatograms of continuous-flow Baeyer-Villiger oxidation of Cyrene™ (2) towards 2H-HBO (3) (Table 2, entry 7).

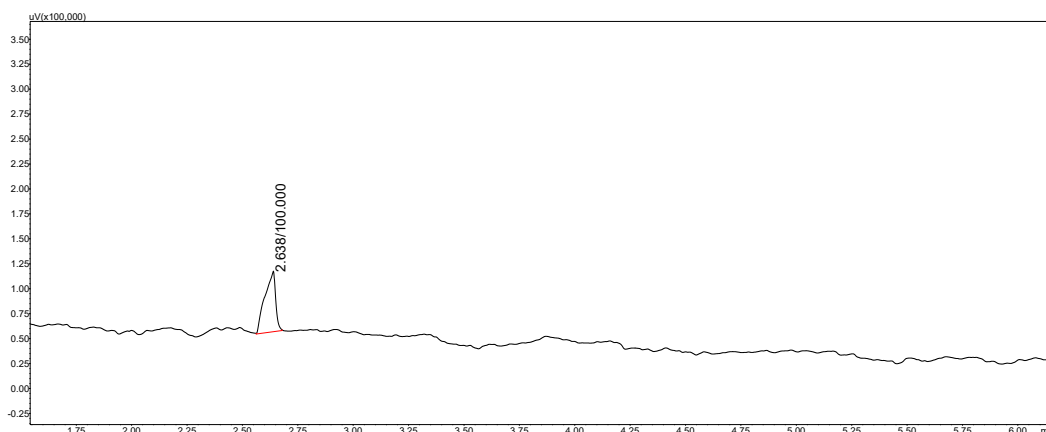

**Figure S18.** GC-FID chromatograms of continuous-flow Baeyer-Villiger oxidation of Cyrene™ (2) towards 2H-HBO (3) (Table 2, entry 8).

### 2.3. Gas Chromatography-Mass Spectrometry (GC-MS): Carboxylic acid 4

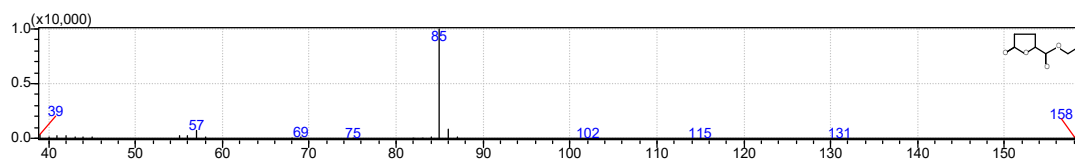

**Figure S19.** Chromatogram for batch oxidation of 2H-HBO (3) towards carboxylic acid 4.

### 2.4. Gas Chromatography-FID Spectrometry (GC-FID): Continuous-flow oxidation of 2H-HBO (3) towards carboxylic acid 4.

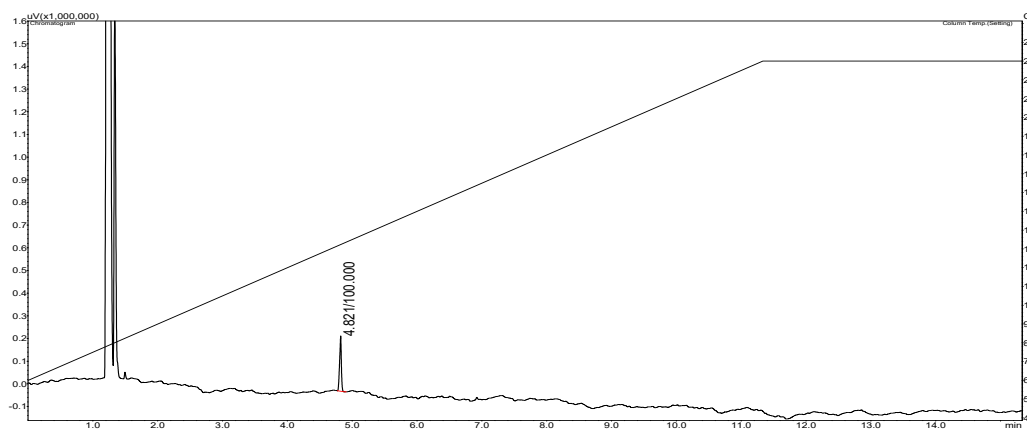

**Figure S20.** Chromatogram for Continuous-flow oxidation of 2H-HBO (3) towards carboxylic acid 4 (Table 3, entry 1).

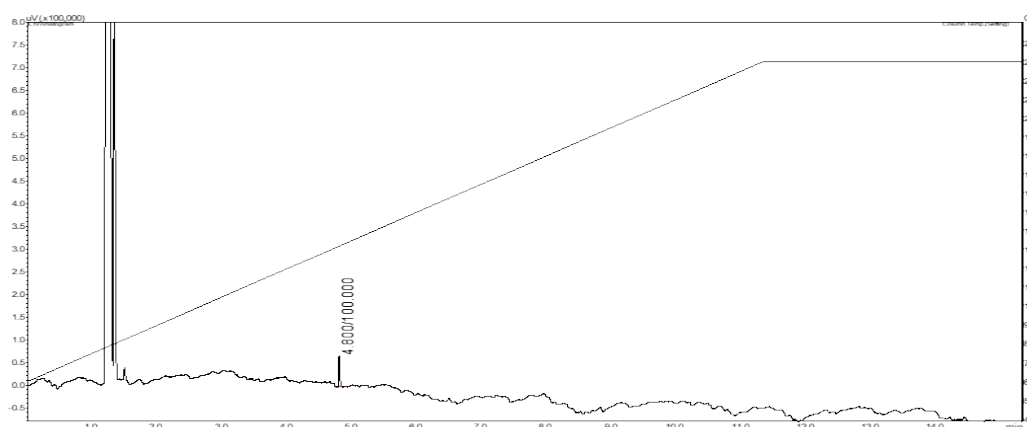

**Figure S21.** Chromatogram for Continuous-flow oxidation of 2H-HBO (3) towards carboxylic acid 4 (Table 3, entry 2).

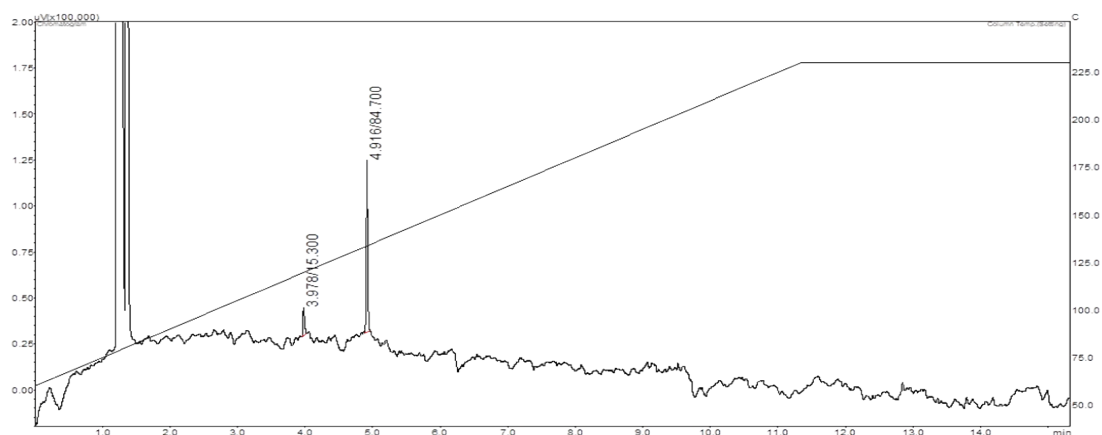

**Figure S22.** Chromatogram for Continuous-flow oxidation of 2H-HBO (**3**) towards carboxylic acid **4** (Table 3, entry 3).

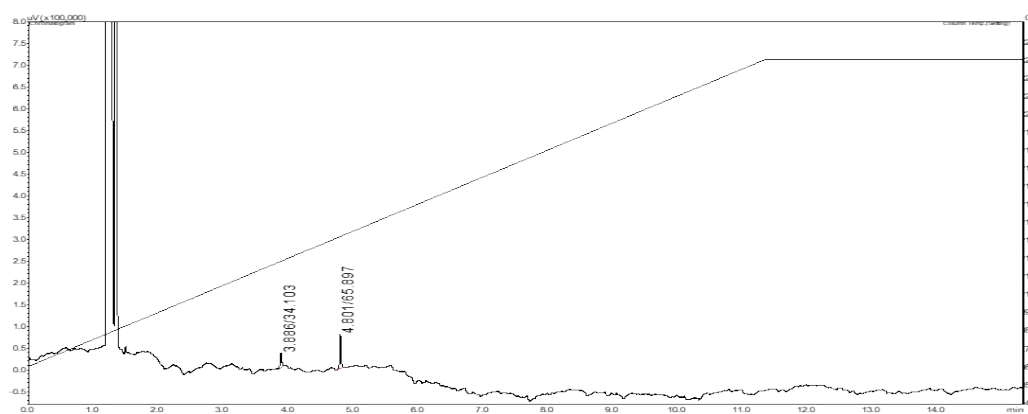

**Figure S23.** Chromatogram for Continuous-flow oxidation of 2H-HBO (**3**) towards carboxylic acid **4** (Table 3, entry 4).

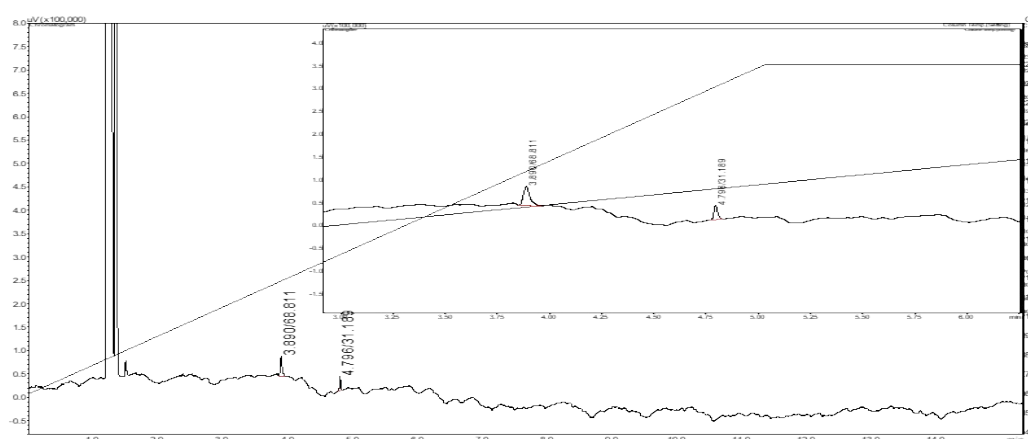

**Figure S24.** Chromatogram for Continuous-flow oxidation of 2H-HBO (**3**) towards carboxylic acid **4** (Table 3, entry 5).

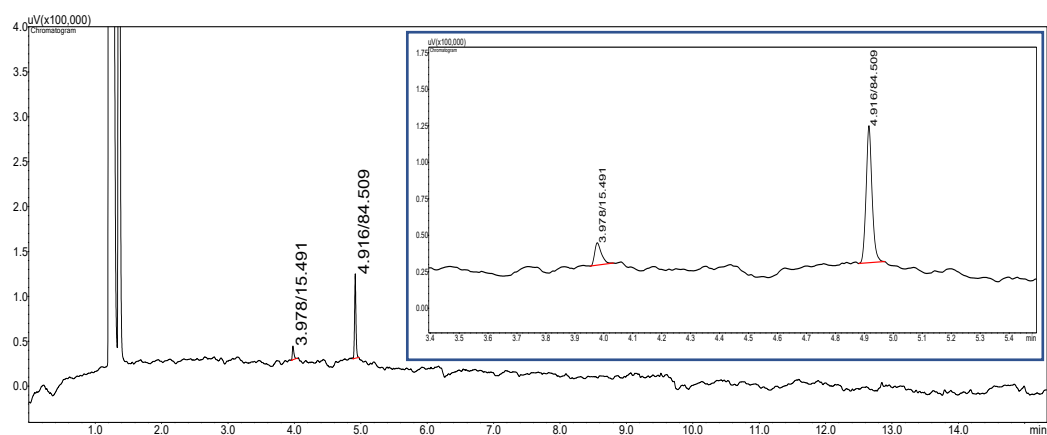

**Figure S25.** Chromatogram for Continuous-flow oxidation of 2H-HBO (**3**) towards carboxylic acid **4** (Table 4, entry 1).

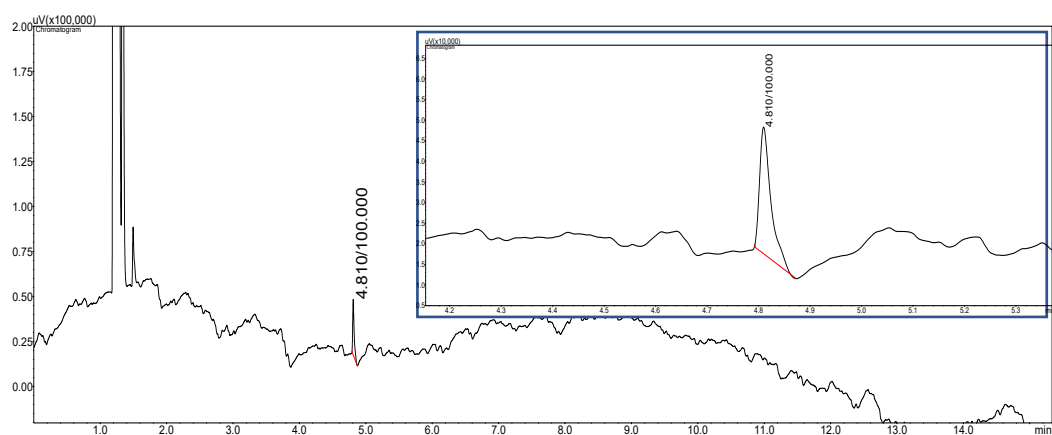

**Figure S26.** Chromatogram for Continuous-flow oxidation of 2H-HBO (**3**) towards carboxylic acid **4** (Table 4, entry 2).

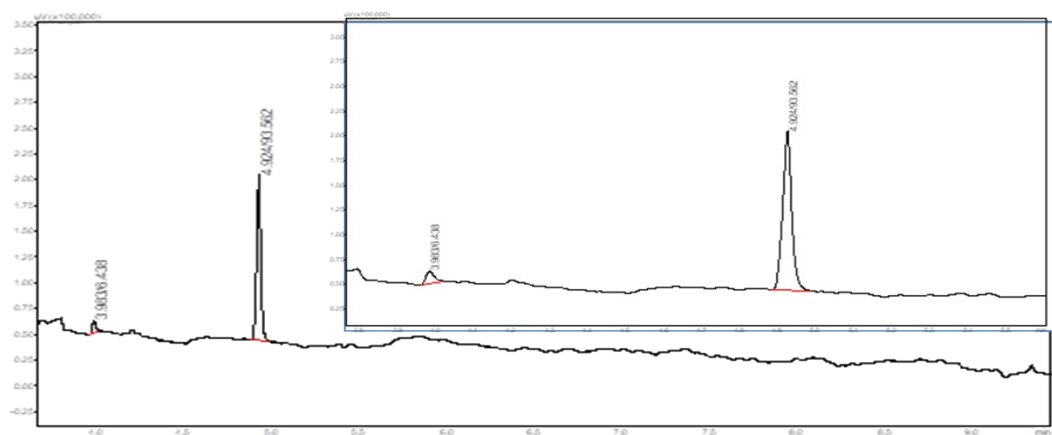

**Figure S27.** Chromatogram for Continuous-flow oxidation of 2H-HBO (**3**) towards carboxylic acid **5** (Table 4, entry 3).

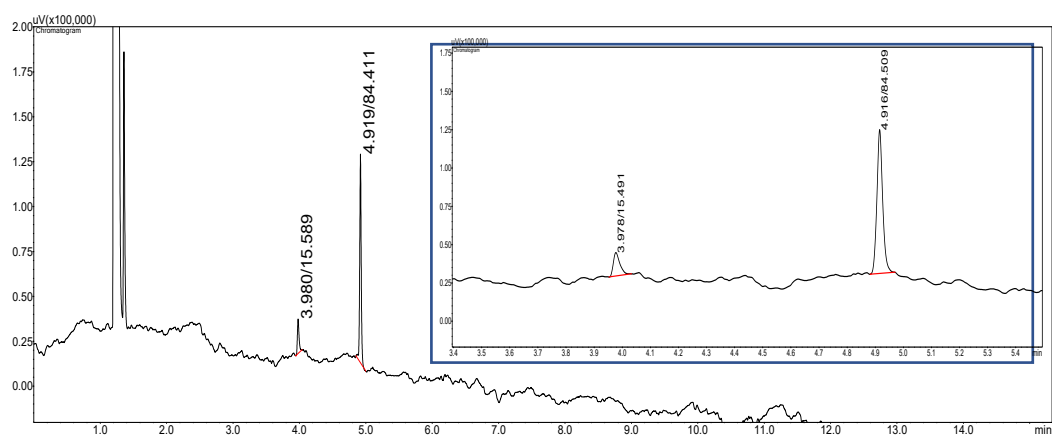

**Figure S28.** Chromatogram for Continuous-flow oxidation of 2H-HBO (**3**) towards carboxylic acid **4** (Table 4, entry 4).

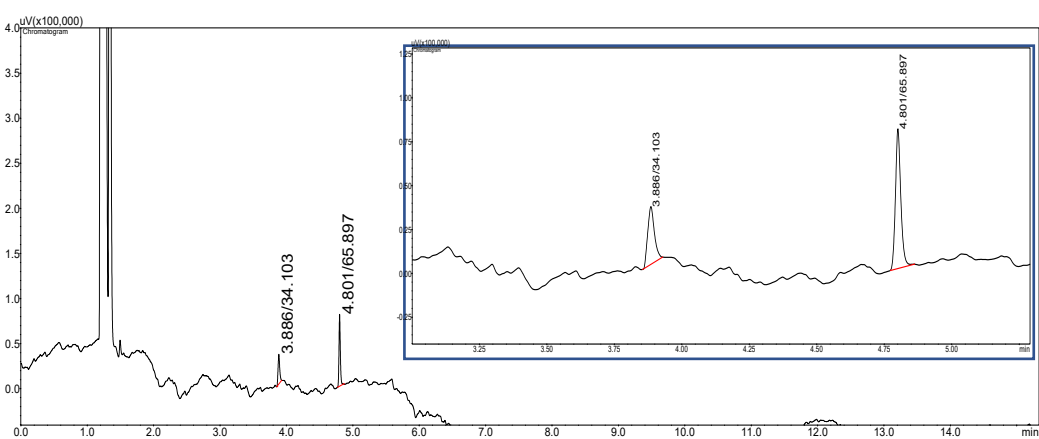

**Figure S29.** Chromatogram for Continuous-flow oxidation of 2H-HBO (**3**) towards carboxylic acid **4** (Table 4, entry 5).

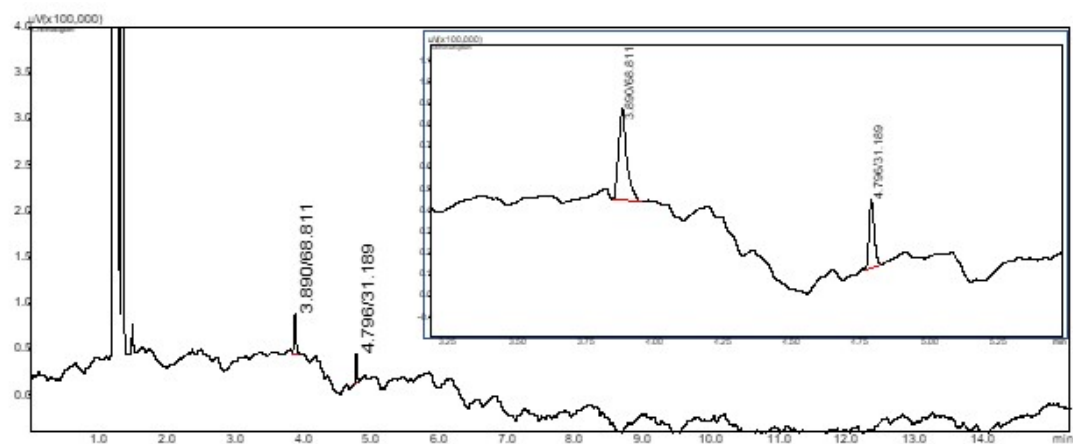

**Figure S30.** Chromatogram for Continuous-flow oxidation of 2H-HBO (**3**) towards carboxylic acid **4** (Table 4, entry 6).

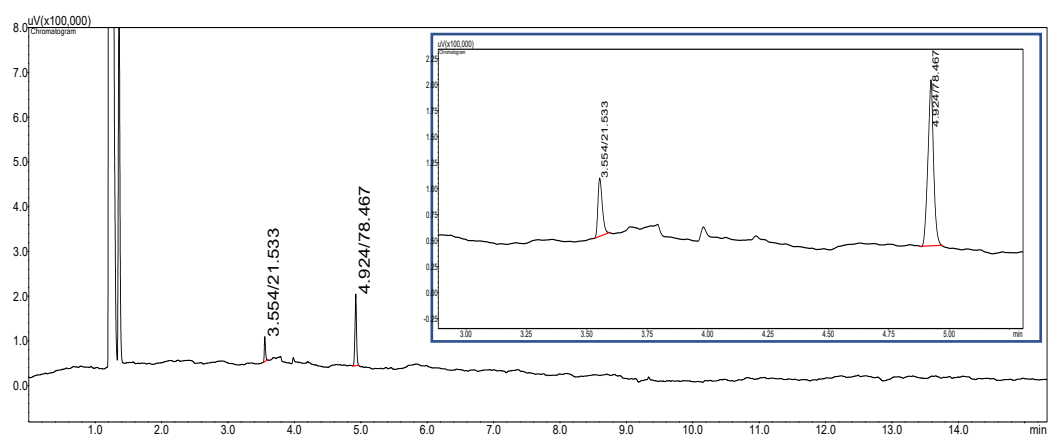

**Figure S31.** Chromatogram for Continuous-flow oxidation of 2H-HBO (**3**) towards carboxylic acid **4** (Table 4, entry 7).

### 3. Spectral data

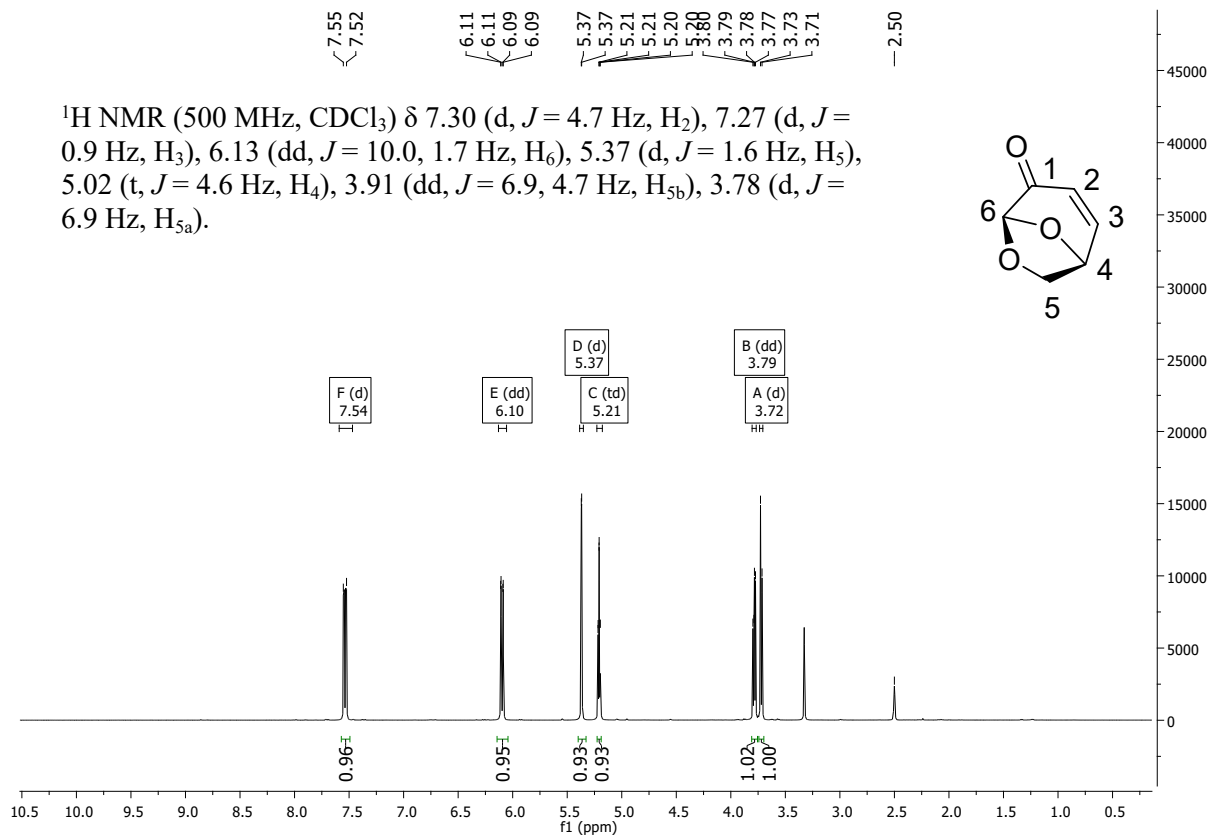

**Figure S32.** <sup>1</sup>H NMR spectrum of Levoglucosenone (LGO, **1**) in CDCl<sub>3</sub>.

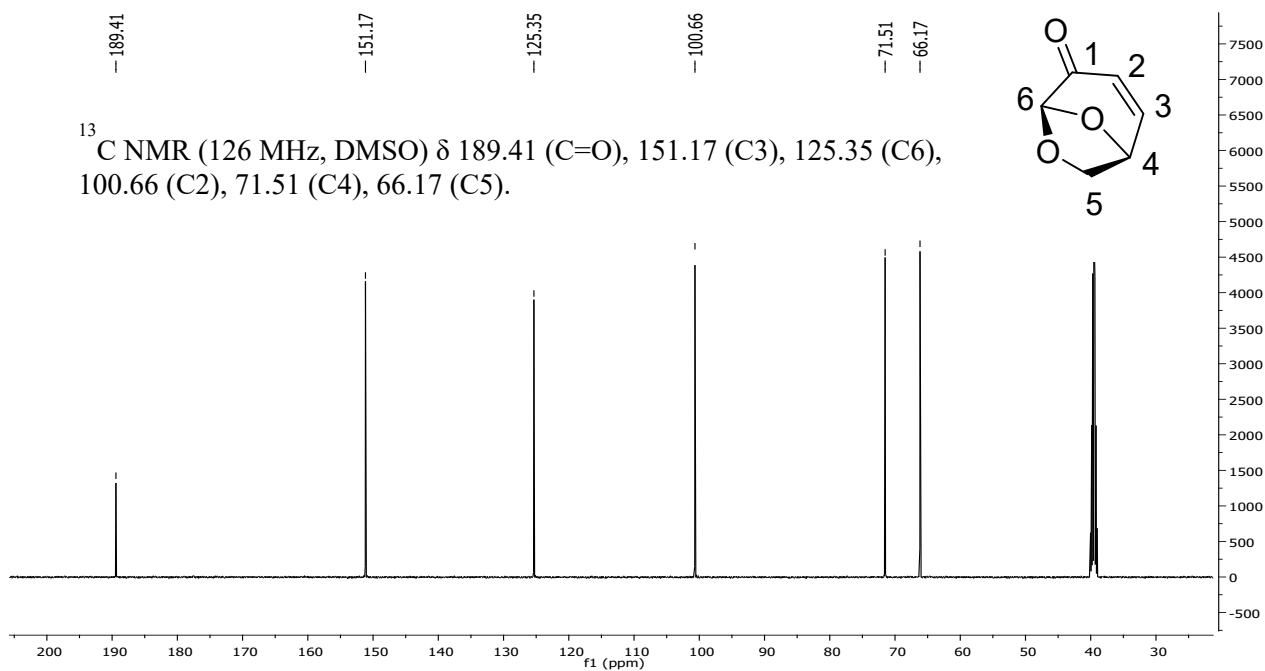

**Figure S33.**  $^{13}\text{C}$  NMR spectrum of Levoglucosenone (LGO, **1**) in  $\text{CDCl}_3$ .

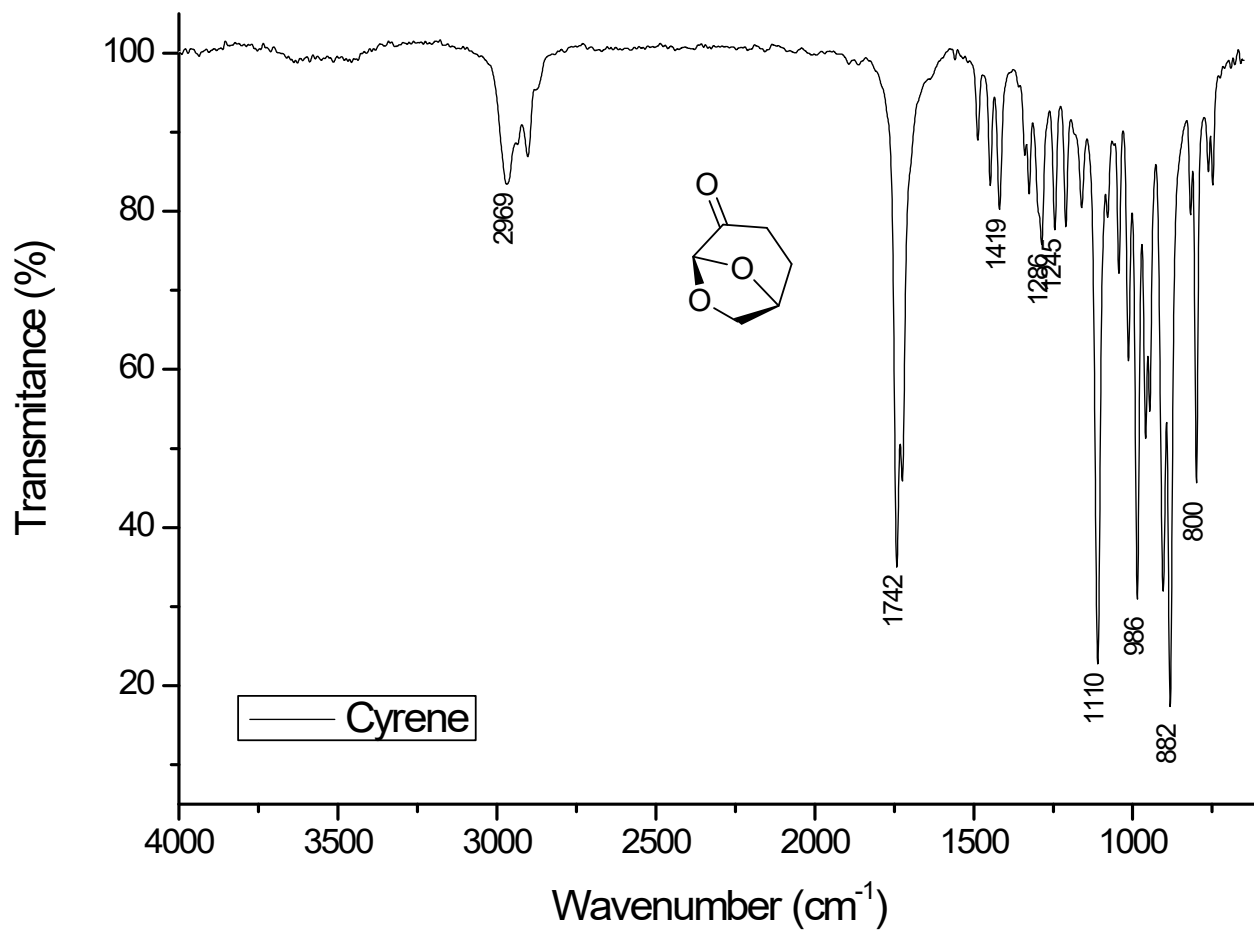

**Figure S34.** Infrared spectrum Cyrene™ (**2**).



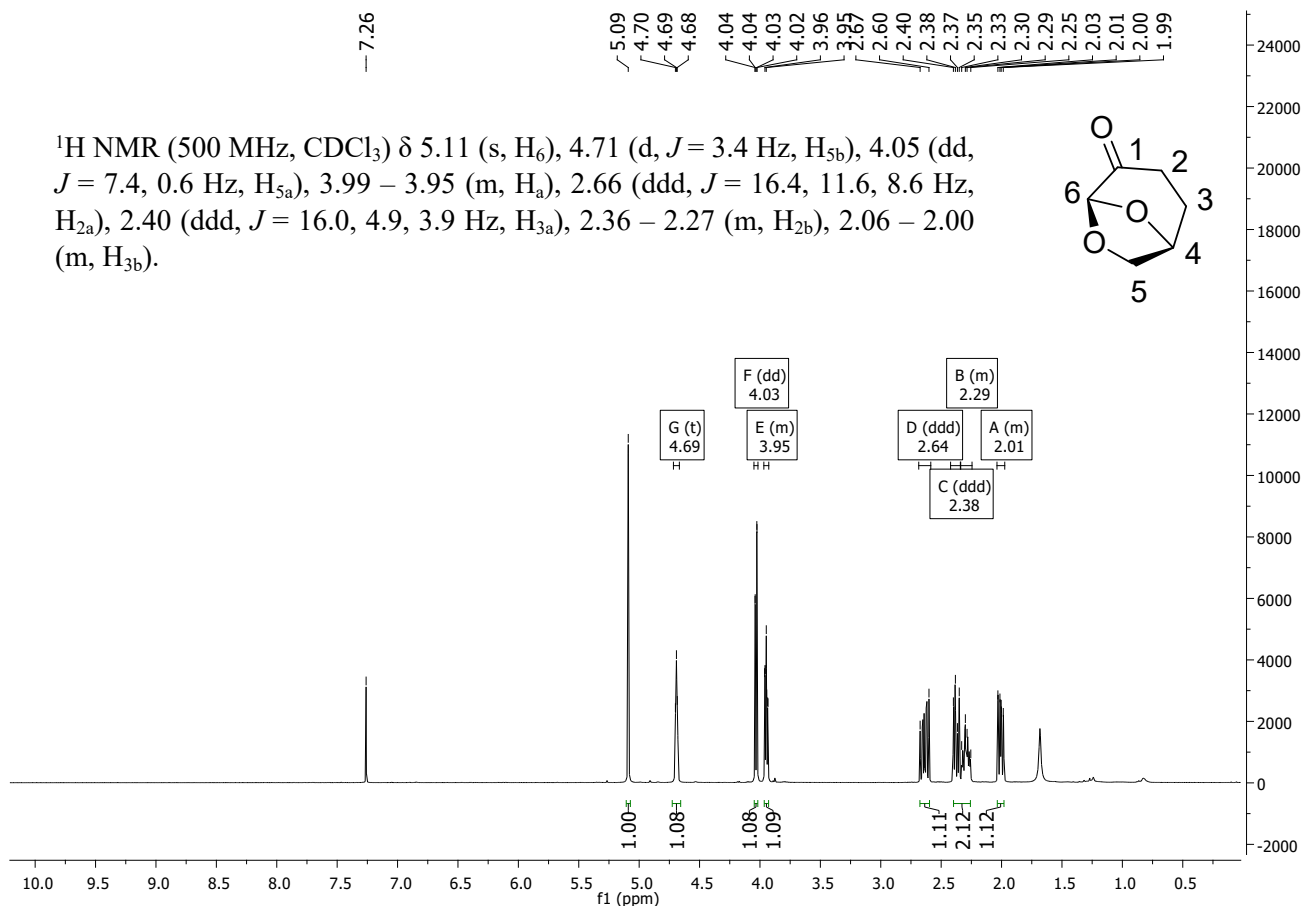

Figure S35.  $^1\text{H}$  NMR spectrum of Cyrene™ (2) in  $\text{CDCl}_3$ .

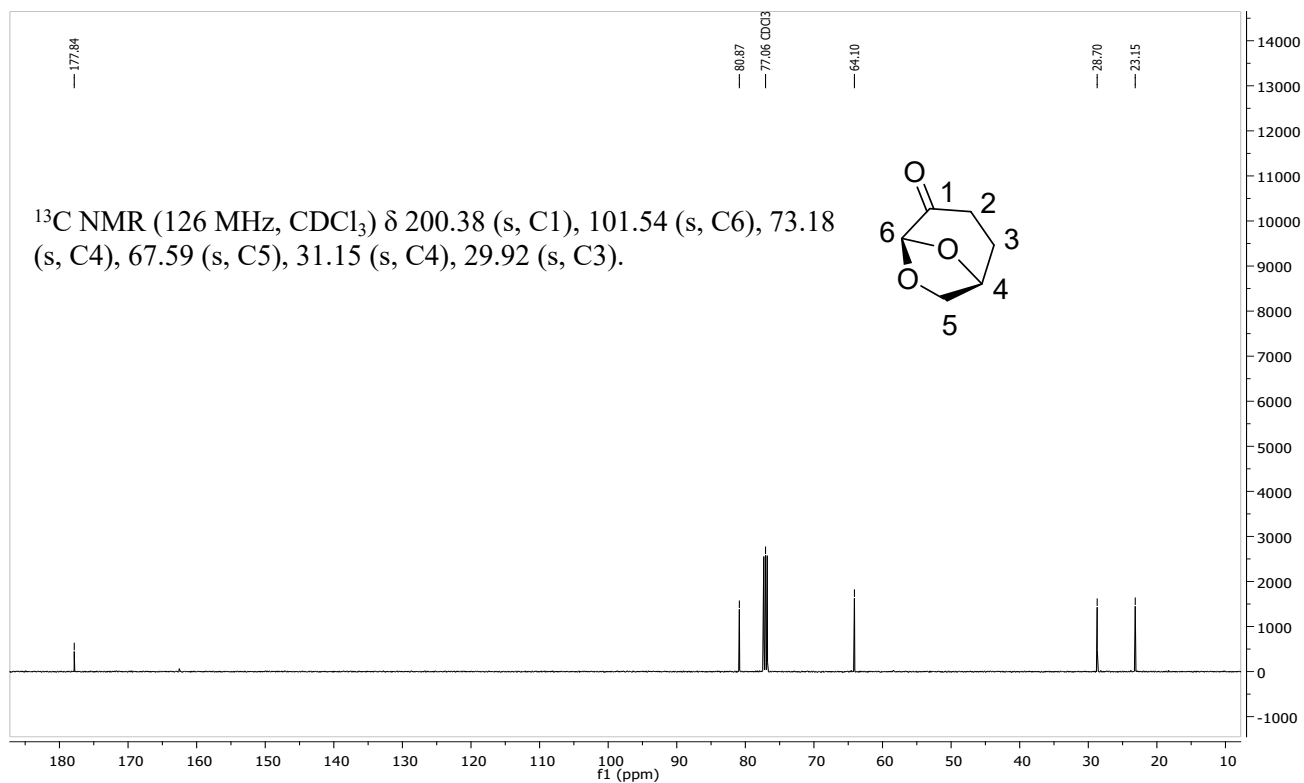

**Figure S36.**  $^{13}\text{C}$  NMR spectrum of Cyrene<sup>TM</sup> (**2**) in  $\text{CDCl}_3$ .

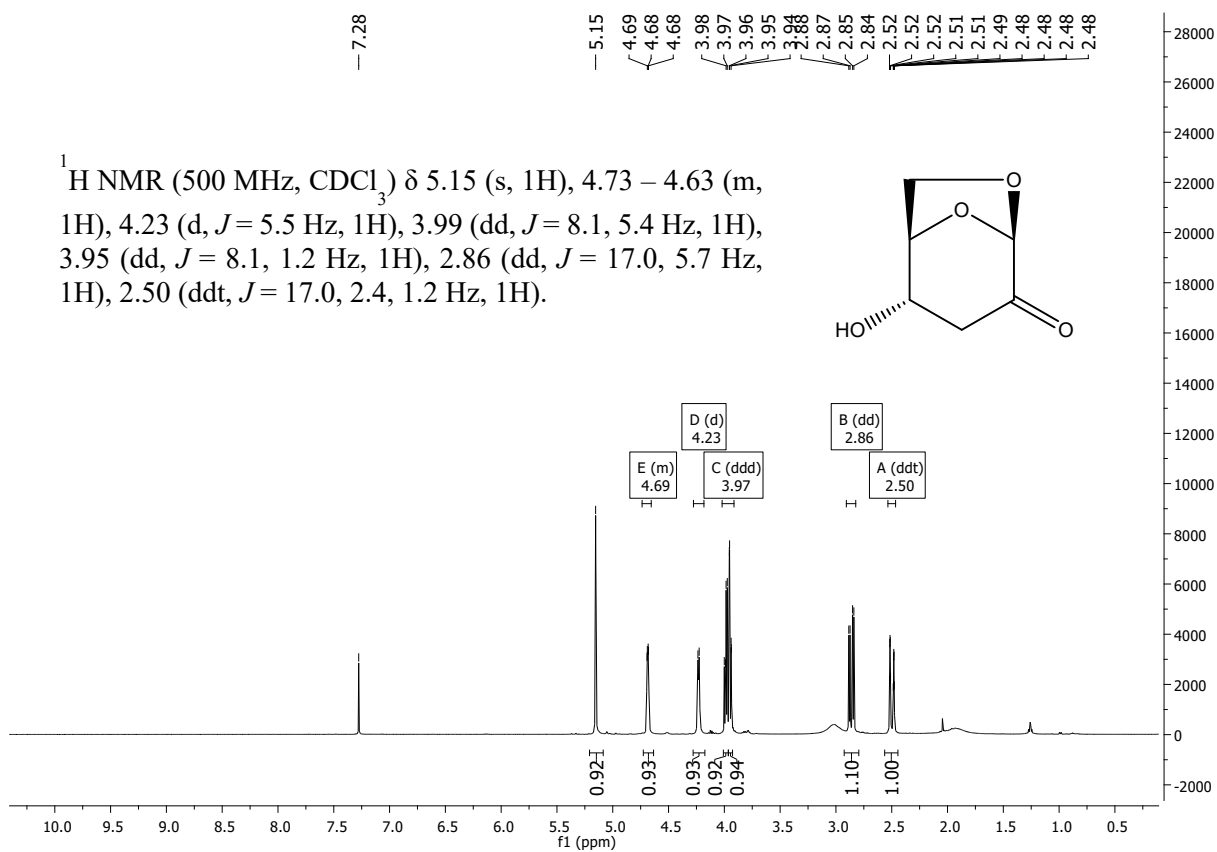

**Figure S37.**  $^1\text{H}$  NMR spectra of the 1,4-addition product **5** (500 MHz,  $\text{CDCl}_3$ ).

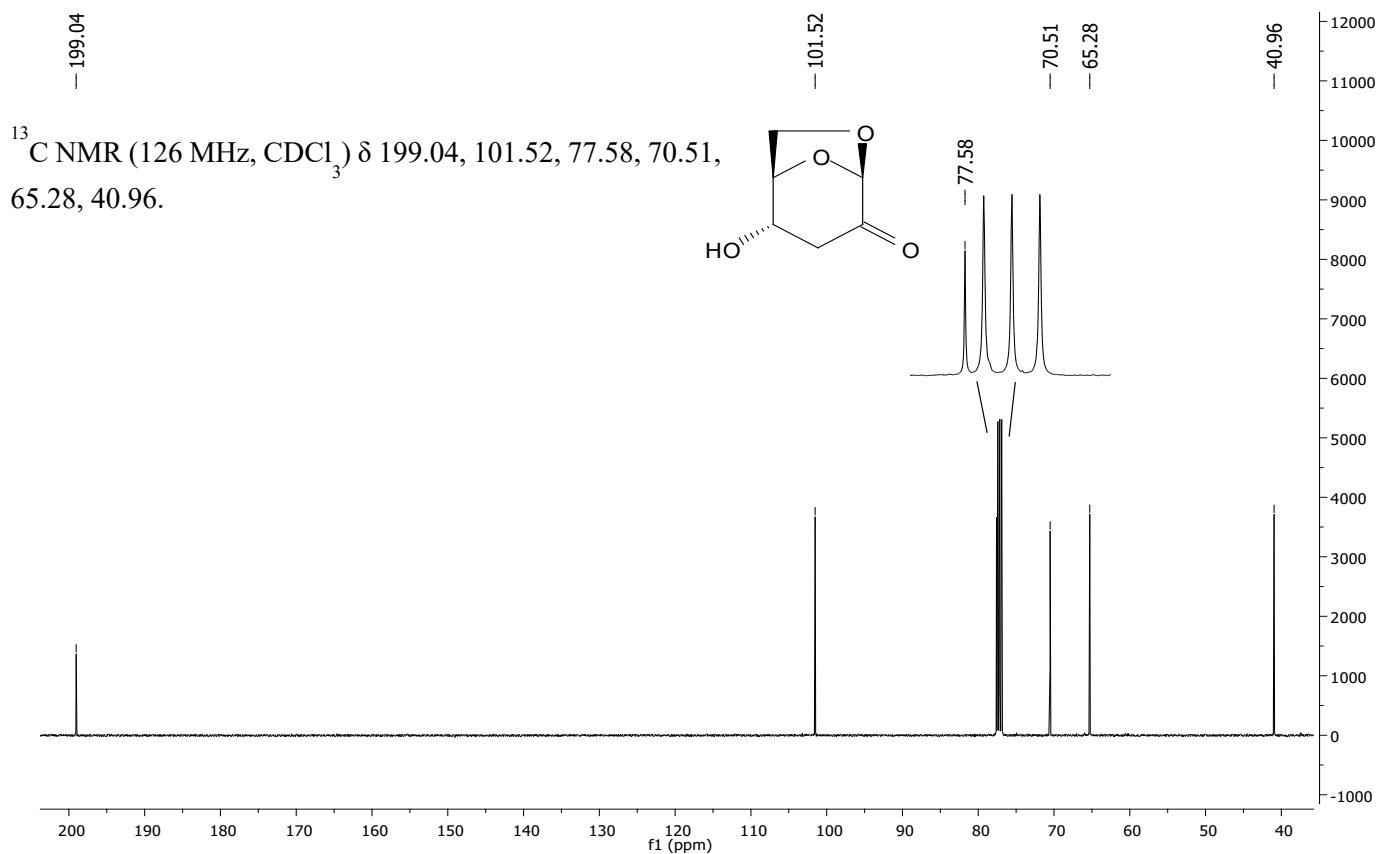

**Figure S38.**  $^{13}\text{C}$  NMR spectra of the 1,4-addition product **5** (500 MHz,  $\text{CDCl}_3$ ).

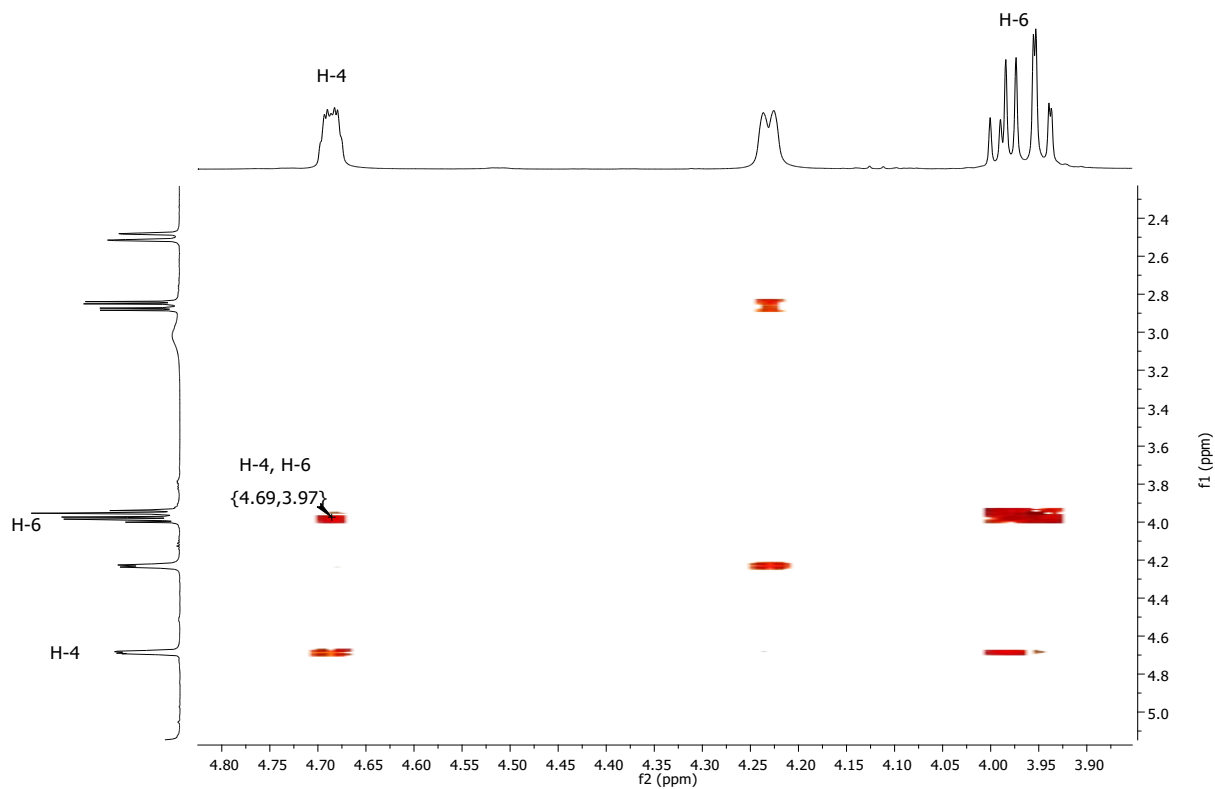

**Figure S39.** Expansion of H-H COSY spectra of the 1,4-addition product **5** (500 MHz,  $\text{CDCl}_3$ ).

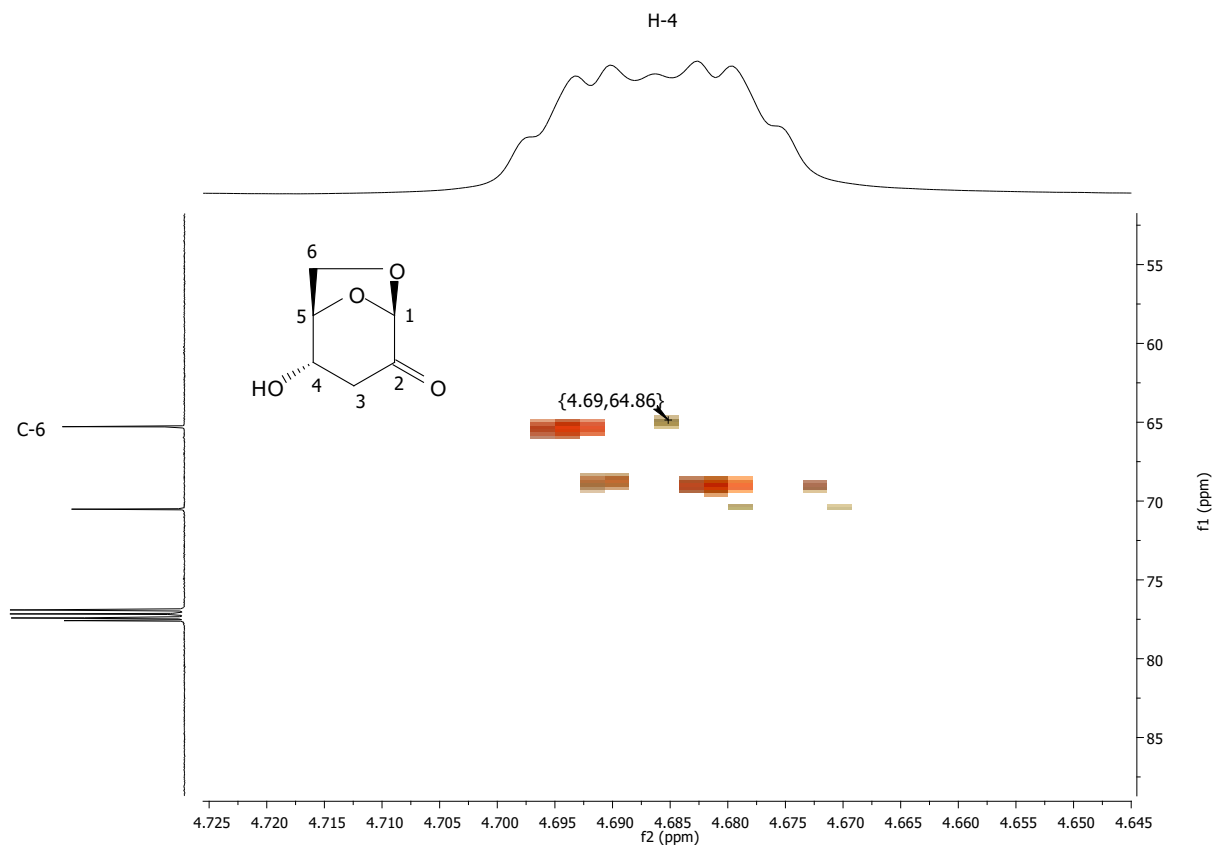

**Figure S40.** Expansion of HMBC H-C ( $J_2$ - $J_3$ ) spectra of the 1,4-addition product **5** (500 MHz,  $\text{CDCl}_3$ ).

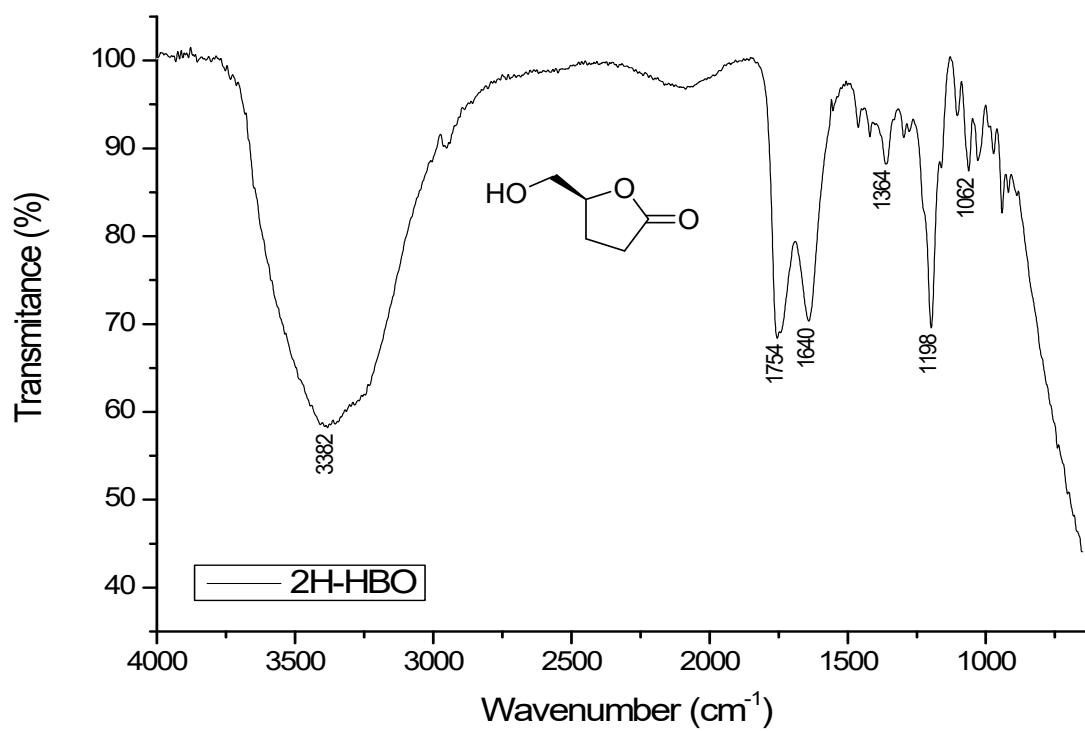

**Figure S41.** Infrared spectrum 2H-HBO (**3**).

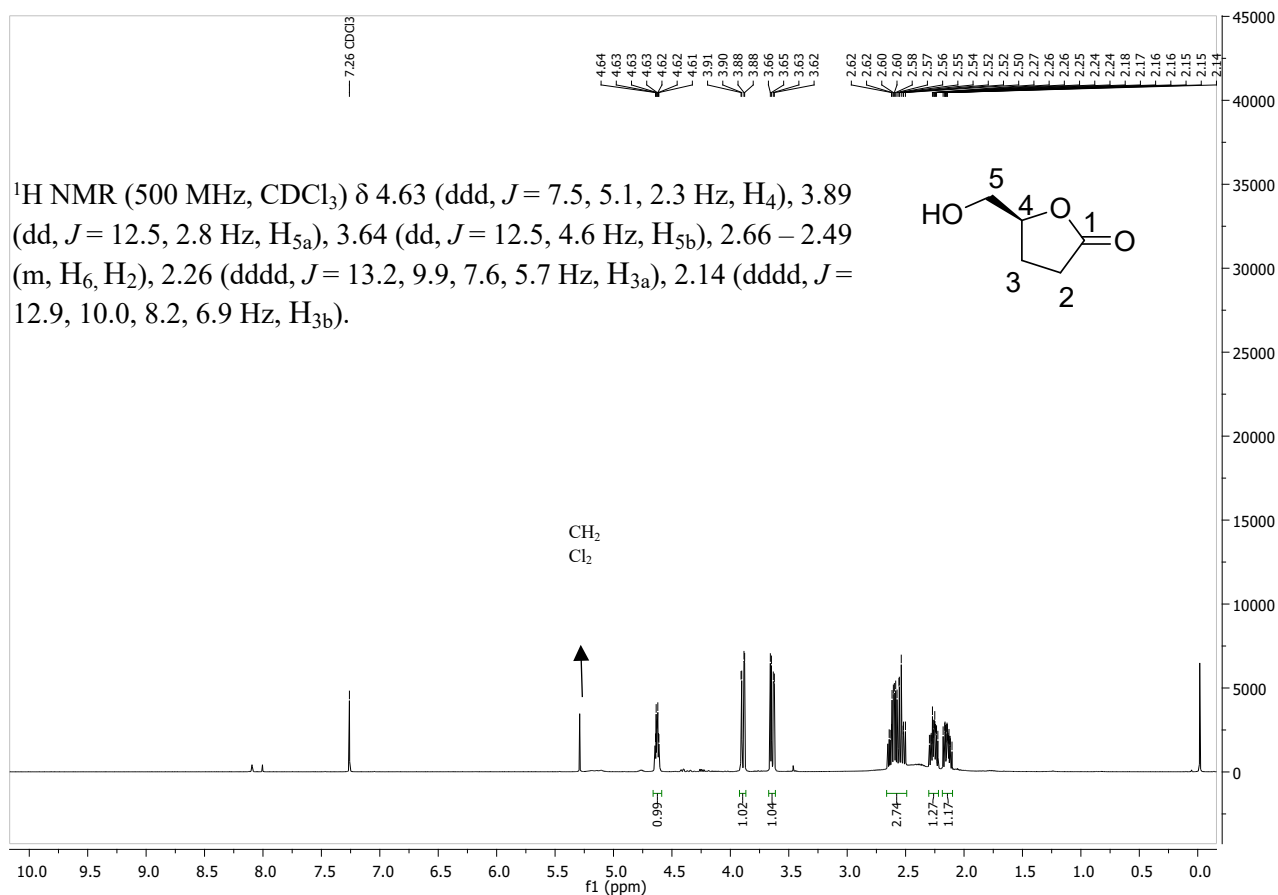

Figure S42. <sup>1</sup>H NMR spectrum of 2H-HBO (**3**) in CDCl<sub>3</sub>.

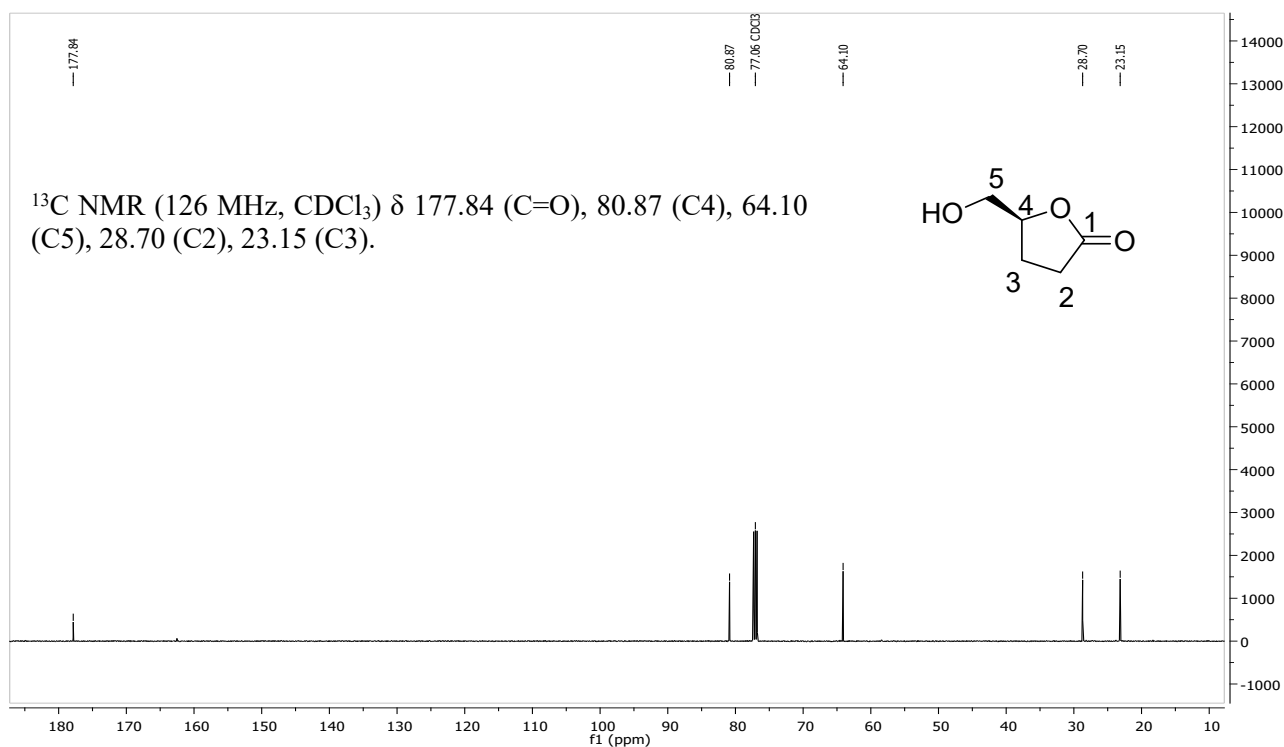

Figure S43. <sup>13</sup>C NMR spectrum of 2H-HBO (**3**) in CDCl<sub>3</sub>.

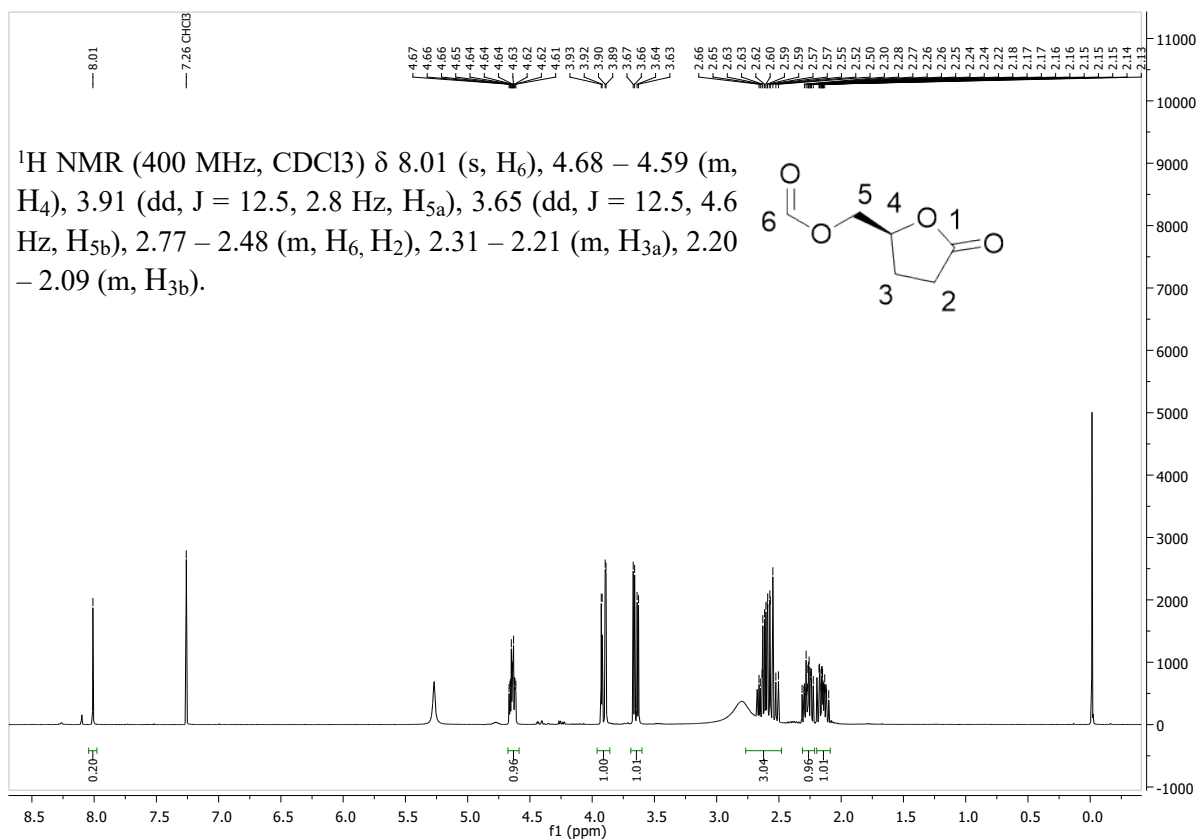

**Figure S44.** <sup>1</sup>H NMR spectrum showing FBO (3) evidence in CDCl<sub>3</sub>.
